# Supplementary material for: Extending density surface models to include multiple and double-observer survey data
Source: PeerJ journal article supplement (doi:10.7717/peerj.12113), 2021-09-02

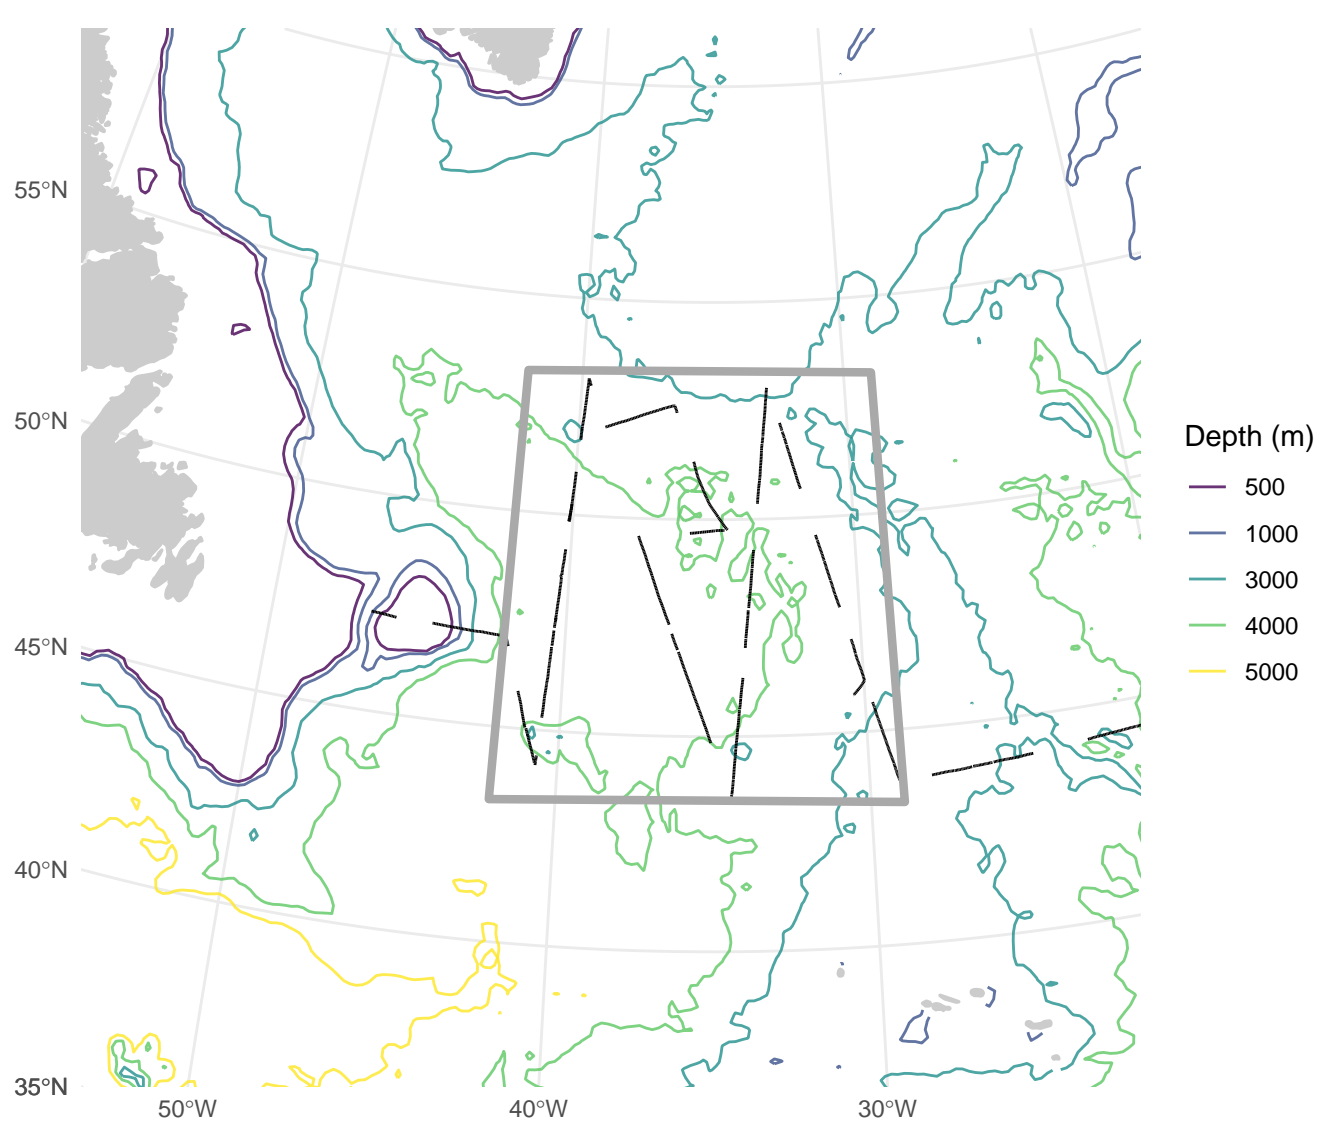

Supplement: fulmar_large_scale.pdf [file fulmar_large_scale.pdf]
