# Supplementary material for: Extending density surface models to include multiple and double-observer survey data
Source: PeerJ journal article supplement (doi:10.7717/peerj.12113), 2021-09-02

Factor  
fly

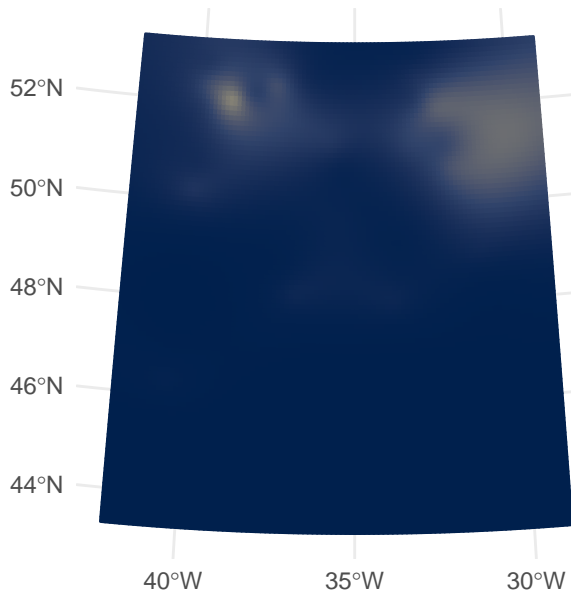

Factor  
swim

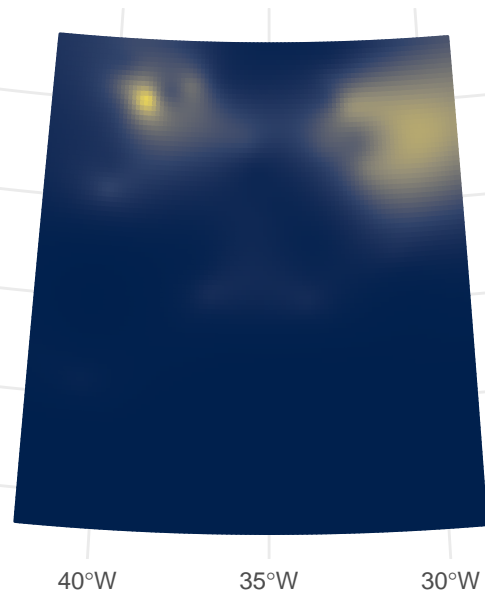

Factor-smooth  
fly

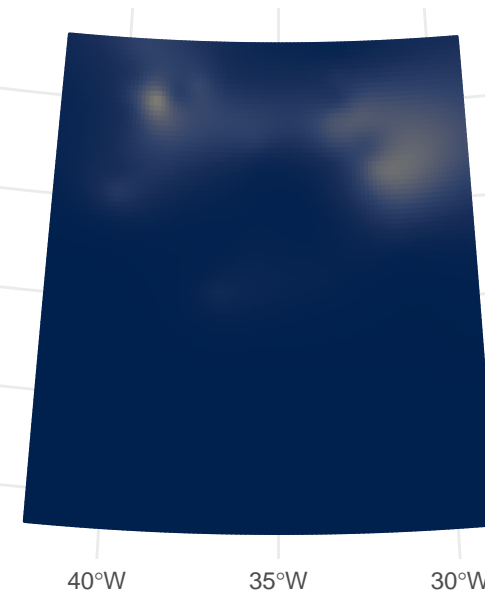

Factor-smooth  
swim

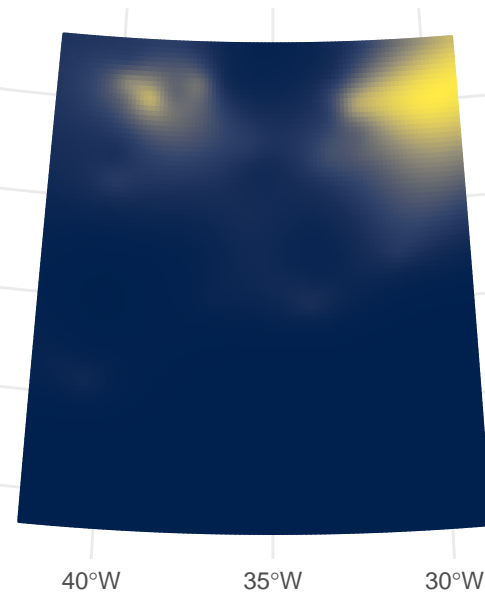

Density  
(birds/ km<sup>2</sup>)

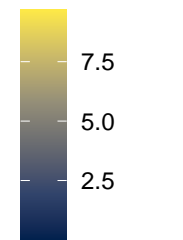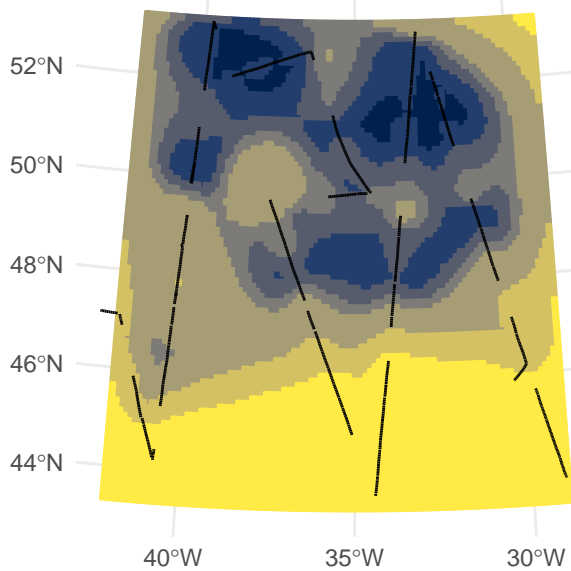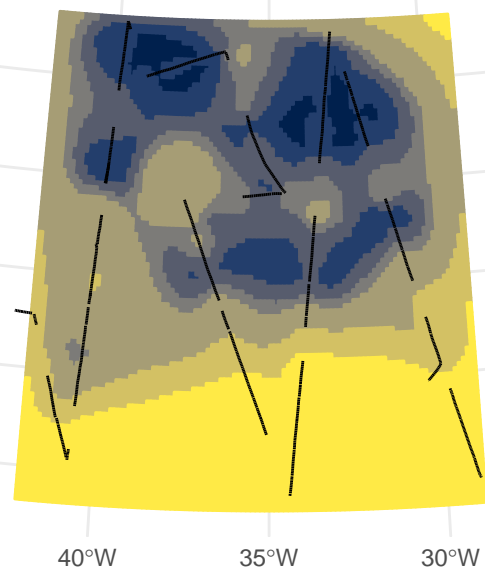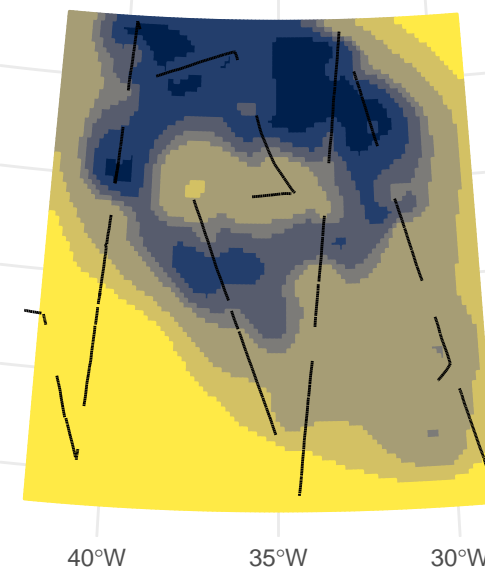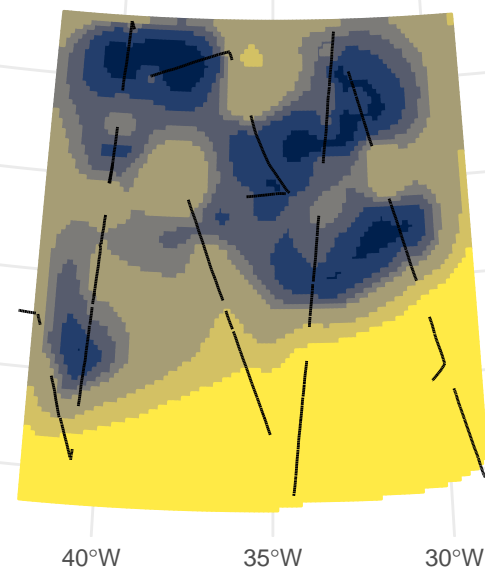

CV

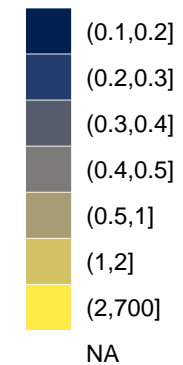

Supplement: fulmar_uncombined.pdf [file fulmar_uncombined.pdf]
